# Supplementary material
Source: publisher figshare collection journal article supplement (https://acs.figshare.com/ndownloader/files/15456371)
Supplement: Supplementary file 1 [file 15456371]

# Bond-Dependent Thole Model for Polarizability and Spectroscopy: Supplemental Information

Mark DelloStritto,<sup>†,‡</sup> Michael L. Klein,<sup>†,¶,‡</sup> and Eric Borguet<sup>\*,†,‡</sup>

<sup>†</sup>*Department of Chemistry*

<sup>‡</sup>*Center for the Complex Materials*

<sup>¶</sup>*Institute for Computational Molecular Science, Temple University, Philadelphia,  
Pennsylvania 19122, United States*

E-mail: eborguet@temple.edu

## TABS Database: COMPD subset

Listed below are the subset of the TABS database for which we generated random configurations using Car-Parinello molecular dynamics in order to test the TholeL method for systems far from the ground state:

## Simulation Details - Liquid Water

The initial positions of the H<sub>2</sub>O molecules were generated using PACKMOL<sup>1</sup> in a cubic simulation box of length 9.877 Å to achieve a density of 0.998 g/cm<sup>3</sup>. We equilibrated the system using a Nose-Hoover thermostat<sup>2,3</sup> for 0.5 ps, as at this time the temperature and energy of the system reached equilibrium. We then ran the simulation in the NVE ensemble for 30 ps. All CPMD calculations were performed using the cp.x module of Quantum Espresso (v.6.2.1)<sup>4,5</sup> using the SCAN functional<sup>6</sup> and HSCV pseudopotentials.<sup>7,8</sup>

Table 1: TABS Subset - CPMD Simulations

|                   |                               |                       |                     |
|-------------------|-------------------------------|-----------------------|---------------------|
| 1-methylimidazole | diacetyl                      | imidazole             | sulfuric-acid       |
| 1-methylimidazole | diazene                       | isobutane             | tartaric-acid       |
| 2-pyridone        | diethylamine                  | isocyanic-acid        | taurine             |
| acetaldehyde      | diethyl-ether                 | isopropyl-alcohol     | tert-butyl-alcohol  |
| acetaldoxamine    | dimethylamine                 | isopropylamine        | tert-butyl-chloride |
| acetic-acid       | dimethyl-ether                | isothiazole           | tert-butyl-cyanide  |
| acetone           | dimethyl-hydrazine            | ketene                | tetrahydrofuran     |
| acetonitrile      | dimethyl-oxalate              | malonic-acid          | thiazole            |
| acetyl-chloride   | dimethyl-sulfide              | methacrylic-acid      | thioacetaldehyde    |
| acetylenamine     | dimethyl-sulfoxide            | methanediol           | thioacetamide       |
| acrylamide        | dioxane                       | methane               | thioformaldehyde    |
| adenine           | dithioamide                   | methanethiol          | thiophene           |
| allyl-alcohol     | ethanediol                    | methanol              | thymine             |
| aminothiazole     | ethane                        | methyl-acrylate       | toluene             |
| aniline           | ethanethiol                   | methylamine           | trimethylamine      |
| ascorbic-acid     | ethanolamine                  | methyl-cyanide        | uracil              |
| benzene           | ethanol                       | methyl-dicyanide      | urea                |
| benzoic-acid      | ethyl-acetate                 | methylhydrazine       | vinyl-acetate       |
| butanal           | ethylamine                    | methyl-isothiocyanate | vinyl-acetylene     |
| butane            | ethyl-cyanide                 | N <sub>2</sub>        | vinyl-alcohol       |
| butanone          | ethylene-dichloride           | neopentane            | vinyl-chloride      |
| butyric-acid      | ethylene-glycol               | NH <sub>3</sub>       |                     |
| butyronitrile     | ethylene                      | nitrobenzene          |                     |
| carbamic-acid     | ethyl-formate                 | nitroethane           |                     |
| carbonyl-sulfide  | ethyl-thiocyanate             | nitromethane          |                     |
| catechol          | formaldehyde                  | nitrous-acid          |                     |
| CCl <sub>4</sub>  | formamide                     | NO <sub>2</sub>       |                     |
| chloramine        | formic-acid                   | NO                    |                     |
| chloroacetic-acid | fulminic-acid                 | O <sub>2</sub>        |                     |
| chlorobenzene     | furan                         | oxalic-acid           |                     |
| chloroform        | glycerol                      | oxaziridine           |                     |
| CO <sub>2</sub>   | glycine                       | pentanal              |                     |
| CO                | guanidine                     | phenol                |                     |
| crotonic-acid     | guanine                       | phosgene              |                     |
| CS <sub>2</sub>   | H <sub>2</sub> O <sub>2</sub> | propanamide           |                     |
| cyanamide         | H <sub>2</sub> O              | propane               |                     |
| cyanic-acid       | HCN                           | propanol              |                     |
| cyanogen          | hexane                        | propene               |                     |
| cyanuric-acid     | hydrazine                     | propionitrile         |                     |
| cyclobutane       | hydroxyacetaldehyde           | propylene-glycol      |                     |
| cyclohexane       | hydroxyacetonitrile           | propyne               |                     |
| cyclohexanol      | hydroxycarbamide              | pyridine              |                     |
| cyclopentane      | hydroxylamine                 | serine                |                     |
| cyclopropane      | hydroxymethylimine            | SO <sub>2</sub>       |                     |
| cytosine          | hypochlorous-acid             | sulfanilamide         |                     |

We plot the O-O radial distribution function (RDF) in figure 1. The O-O RDF matches that found using X-ray diffraction quite well, indicating that we have built an accurate model of water.

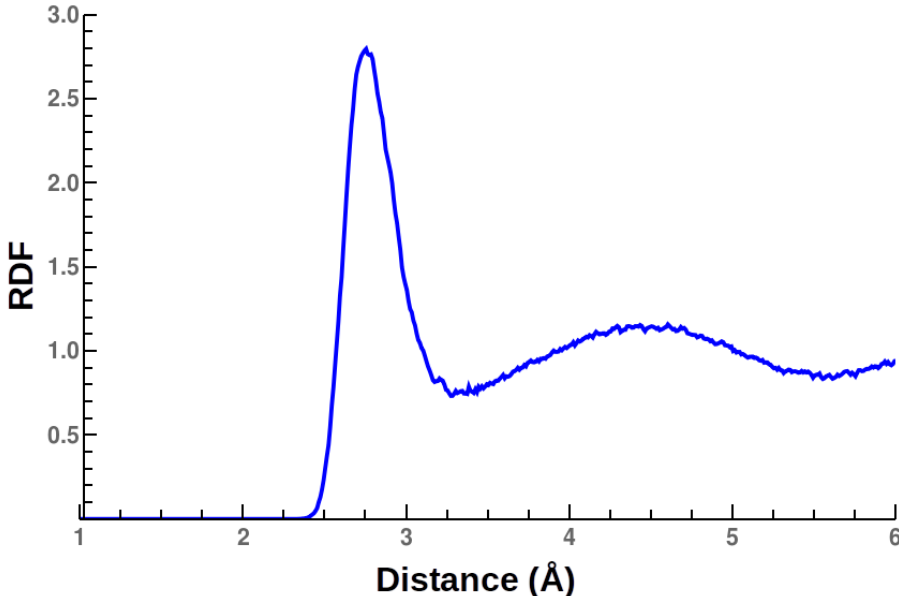

Figure 1: The O-O RDF for liquid water simulated with SCAN at 300K.

## Simulation Details - Solvated Urea

The initial positions of the H<sub>2</sub>O and urea molecules were generated using PACKMOL<sup>1</sup> in a cubic simulation box of length 10.50 Å to achieve a density of 0.917 g/cm<sup>3</sup>. Note that this density is slightly low, but we found that this box length yielded the most accurate structure of water as determined by the O-O RDF. We equilibrated the system using velocity rescaling followed by a Nose-Hoover thermostat<sup>2,3</sup> for 3.8 ps until the temperature and energy of the system reached equilibrium. We then ran the simulation in the NVE ensemble for 30 ps. All CPMD calculations were performed using the cp.x module of Quantum Espresso (v.6.2.1)<sup>4,5</sup> using the SCAN functional<sup>6</sup> and HSCV pseudopotentials.<sup>7,8</sup>

We plot the O-O radial distribution function (RDF) for O in H<sub>2</sub>O molecules in figure 2. The O-O RDF, though slightly over-structured, matches that found using X-ray diffraction

quite well, indicating that we have an appropriate volume to accommodate the molecules in the system.

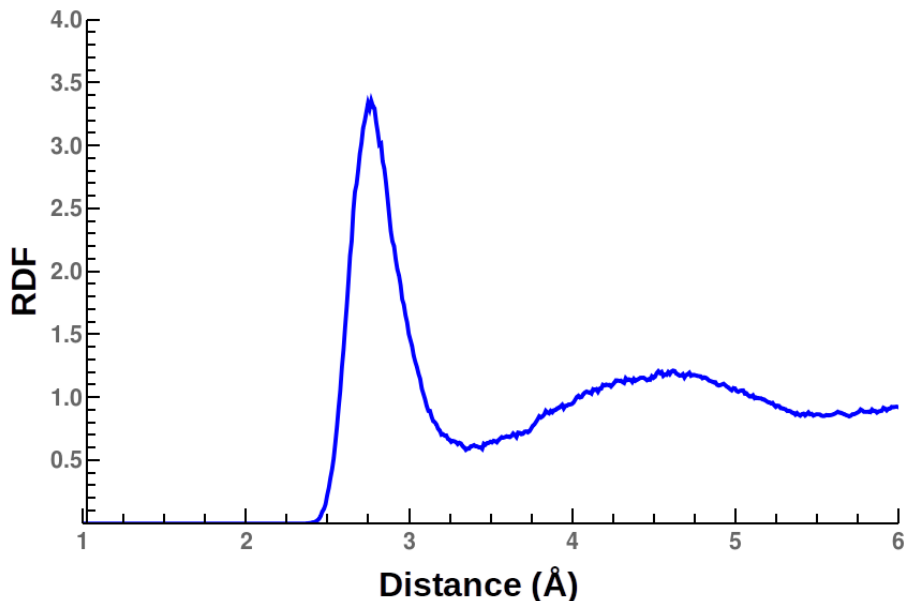

Figure 2: The O-O RDF for H<sub>2</sub>O molecules for urea solvated in water simulated with SCAN at 300K.

## Simulation Details - Crystalline Urea

The initial configuration was obtained from neutron diffraction experiments<sup>9</sup> and the cell parameters were optimized using the cp.x module of Quantum Espresso (v.6.2.1)<sup>4,5</sup> using the SCAN functional<sup>6</sup> and HSCV pseudopotentials<sup>7,8</sup> to find final cell parameters of (5.661 x 5.661 x 4.712)Å. We then generated a supercell by doubling the lattice vectors, resulting in a cell containing 16 urea molecules. We then equilibrated the system using velocity rescaling followed by a Nose-Hoover thermostat<sup>2,3</sup> for 2.6 ps until the temperature and energy of the system reached equilibrium. We then ran the simulation in the NVE ensemble for 20 ps.

# Simulation Details - Gaseous Urea

We simulated a gas-phase urea molecule using the cp.x module of Quantum Espresso (v.6.2.1)<sup>4,5</sup> using the SCAN functional<sup>6</sup> and HSCV pseudopotentials<sup>7,8</sup> in a cubic simulation cell of dimension 10Å. We did not attempt to strictly control temperature, but to get close to 300K we ran the molecule in the NVT ensemble first with velocity rescaling and then with a Nose-Hoover thermostat<sup>2,3</sup> for 1.25 ps in order to initially populate the vibrational modes of the system. We then ran the simulation in the NVE ensemble for 20 ps.

## Polarizability Parameters:

We list the optimized parameters for the Thole and TholeL models in the Table 2. The dimensionless constant A is a global scaling factor used for the “Exp” interaction.

Table 2: Atomic Polarizability Parameters (a.u.)

| Element | EXP   | EXP-L | ERF   | ERF-L |
|---------|-------|-------|-------|-------|
| A       | 2.20  | 2.37  | N/A   | N/A   |
| O       | 4.98  | 6.08  | 5.44  | 6.62  |
| H       | 2.01  | 2.16  | 2.76  | 2.80  |
| C       | 9.79  | 9.56  | 9.45  | 10.44 |
| N       | 8.38  | 9.73  | 9.71  | 12.38 |
| Cl      | 16.65 | 16.21 | 16.21 | 15.89 |
| F       | 2.65  | 3.28  | 3.08  | 3.49  |
| S       | 22.77 | 23.04 | 23.35 | 24.29 |
| Br      | 24.32 | 23.59 | 23.78 | 23.26 |

## References

- (1) Martínez, L.; Andrade, R.; Birgin, E. G.; Martínez, J. M. PACKMOL: A Package for Building Initial Configurations for Molecular Dynamics Simulations. *Journal of Computational Chemistry* **2009**, *30*, 2157–2164.
- (2) Nosé, S. A Unified Formulation of the Constant Temperature Molecular Dynamics Methods. *The Journal of Chemical Physics* **1984**, *81*, 511–519.
- (3) Bylander, D. M.; Kleinman, L. Energy Fluctuations Induced by the Nosé Thermostat. *Physical Review B* **1992**, *46*, 13756–13761.
- (4) Giannozzi, P. et al. QUANTUM ESPRESSO: a Modular and Open-Source Software Project for Quantum Simulations of Materials. *Journal of Physics: Condensed Matter* **2009**, *21*, 395502.
- (5) Giannozzi, P. et al. Advanced Capabilities for Materials Modelling with Quantum ESPRESSO. *Journal of Physics: Condensed Matter* **2017**, *29*, 465901.
- (6) Sabatini, R.; Gorni, T.; de Gironcoli, S. Nonlocal van der Waals Density Functional Made Simple and Efficient. *Physical Review B* **2013**, *87*, 041108.
- (7) Hamann, D. R.; Schlüter, M.; Chiang, C. Norm-Conserving Pseudopotentials. *Physical Review Letters* **1979**, *43*, 1494–1497.
- (8) Vanderbilt, D. Optimally Smooth Norm-Conserving Pseudopotentials. *Physical Review B* **1985**, *32*, 8412–8415.
- (9) Worsham, J. E.; Levy, H. A.; Peterson, S. W. The Positions of Hydrogen Atoms in Urea by Neutron Diffraction. *Acta Crystallographica* **1957**, *10*, 319–323.
